# Supplementary figures and images for: Effects of Different Pretreatments of DNA Extraction from Dried Specimens of Ladybird Beetles (Coleoptera: Coccinellidae)
Source: MDPI journal article supplement (doi:10.3390/insects10040091), 2019-03-29

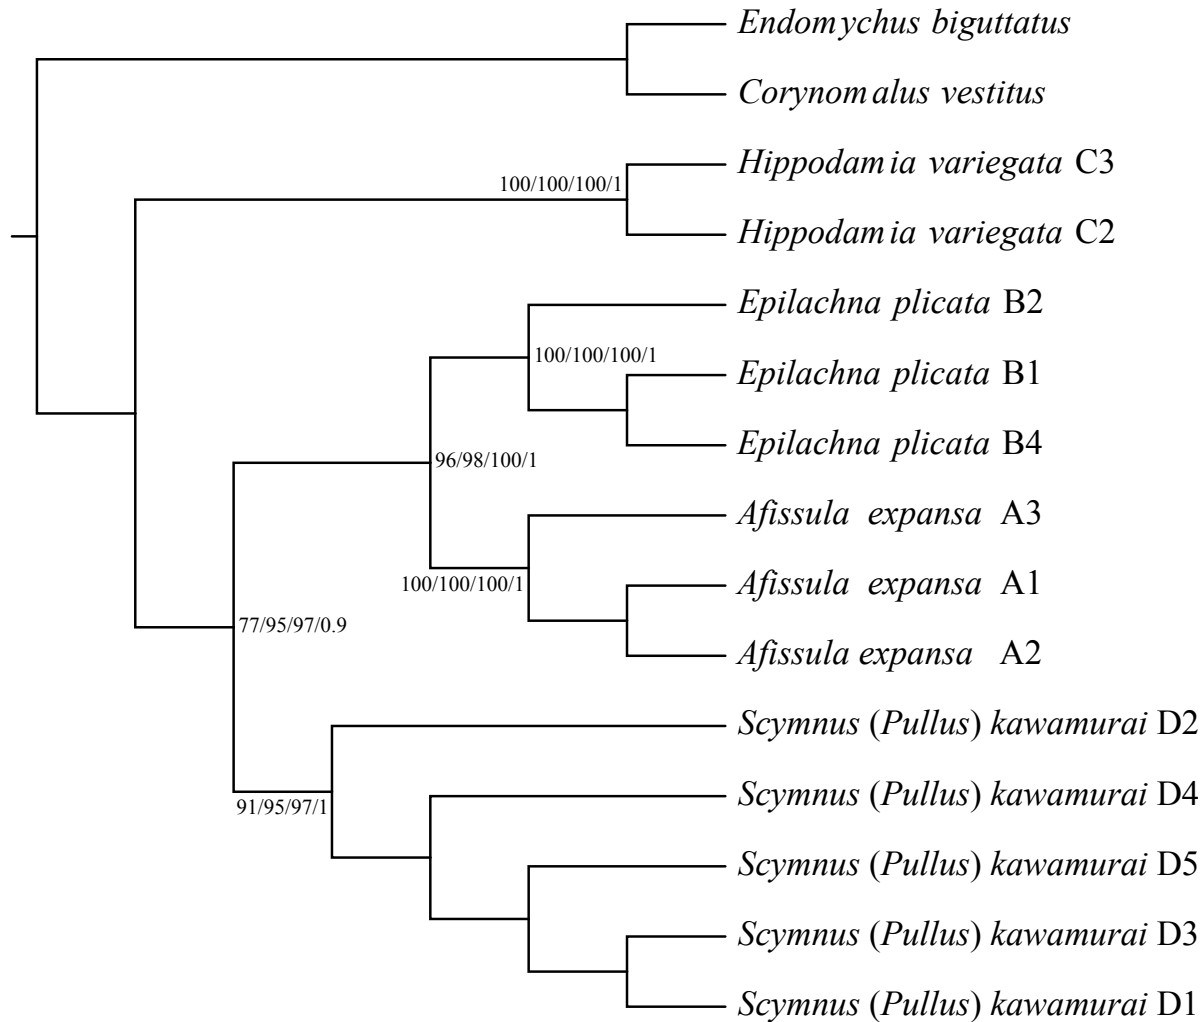

Supplement: s1 [file s1]

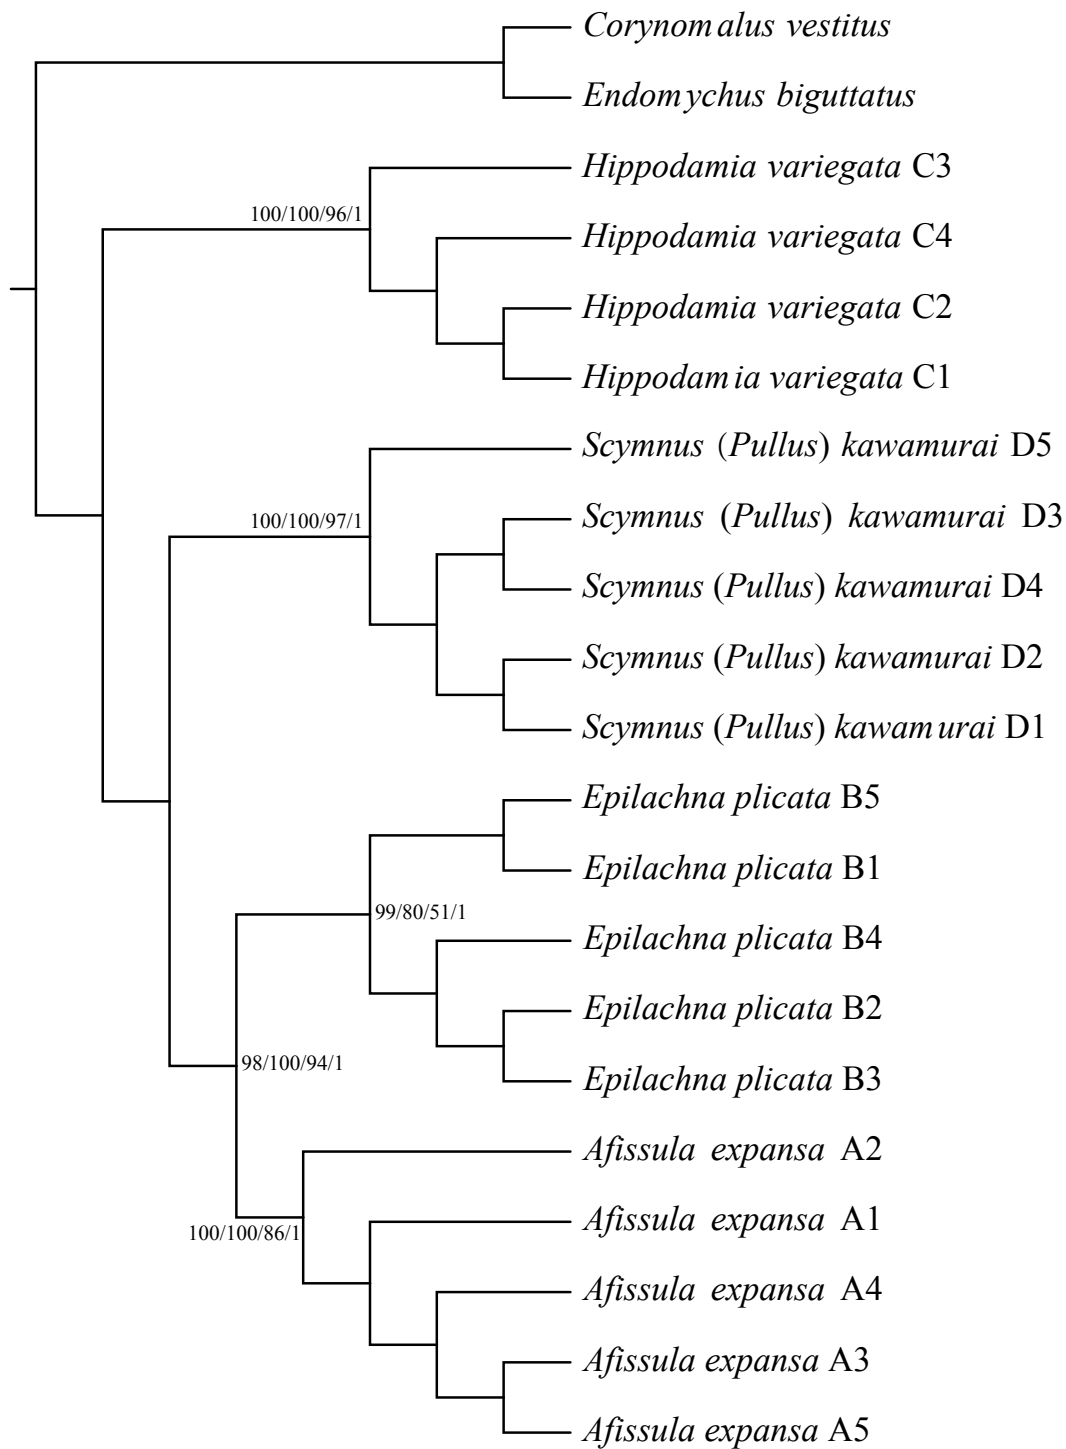

Supplement: s1 [file s1]

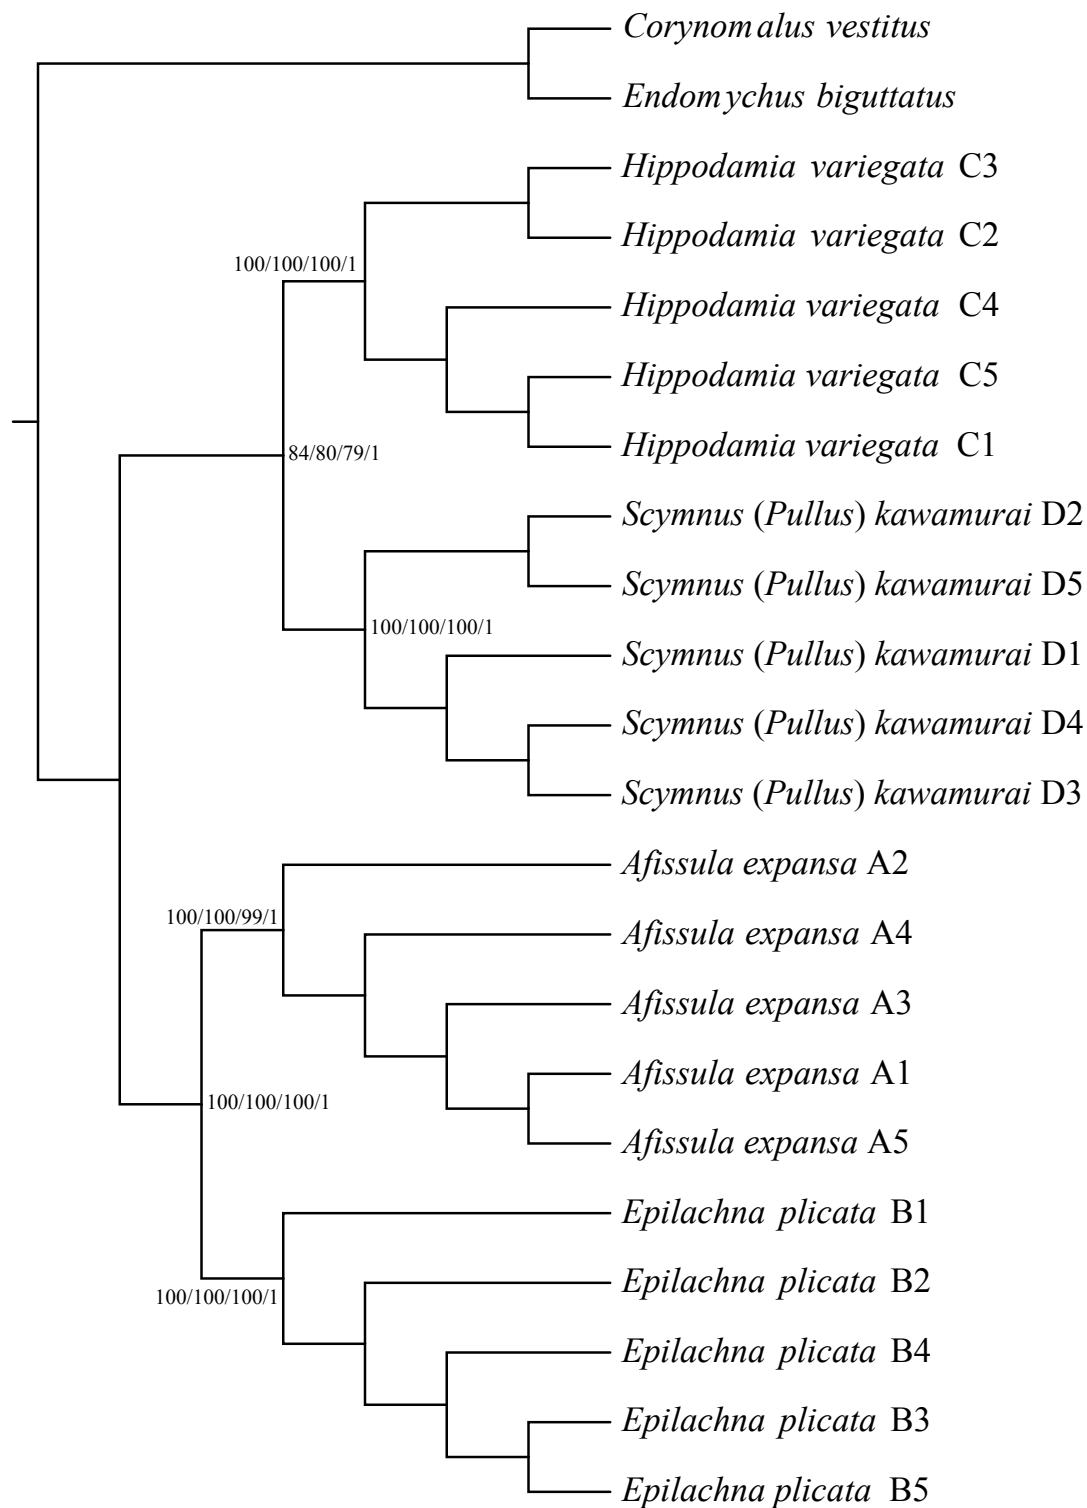

Supplement: s1 [file s1]
